# Supplementary material
Source: Springer Nature journal article supplement (https://www.springermedizin.de/resource/supplementary/12907_2012_118_MOESM8_ESM.pdf/9524704)

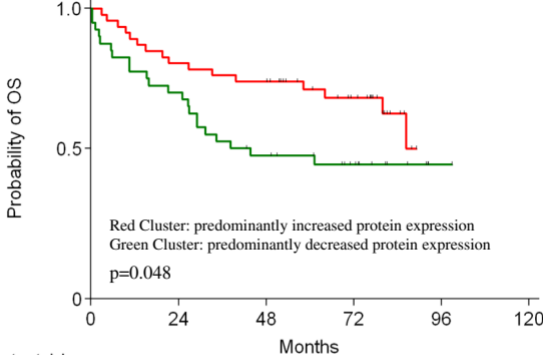

Patients at risk

|               |    |    |    |    |   |   |
|---------------|----|----|----|----|---|---|
| Red cluster   | 46 | 37 | 34 | 20 | 0 | 0 |
| Green cluster | 40 | 28 | 18 | 11 | 1 | 0 |

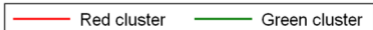

Supplement: MOESM8 [file 9524704]
